# Supplementary material for: Protic ionic liquid [Bim][NTf2] with strong hydrogen bond donating ability for highly efficient ammonia absorption
Source: Royal Society of Chemistry journal article supplement (doi:10.1039/c6gc03026b), 2016-12-08
Supplement: c6gc03026b1.pdf [file c6gc03026b1.pdf]

## Protic ionic liquid [Bim][NTf<sub>2</sub>] with strong hydrogen bond donating ability for highly efficient ammonia absorption

### Supporting Information

#### 1. Determination of dissociation constants pK<sub>a</sub>

Dissociation equilibrium of the ILs can be described as the following process:

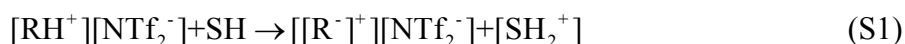

Where SH means a solvent, SH<sub>2</sub><sup>+</sup> denotes a solvated proton, and RH<sup>+</sup>, [R<sup>-</sup>]<sup>+</sup> represents the acid cation and the conjugate base of the cation of the IL. The dissociation constant of the ILs can be explained by:

$$K_a = \frac{[[\text{R}^-]^+][\text{NTf}_2^-][\text{SH}_2^+]}{[\text{RH}^+][\text{NTf}_2^-]} \quad (\text{S2})$$

There are mass and charge balance at any point of the titrations:

$$[[\text{RH}^+][\text{NTf}_2^-]]_{\text{total}} = [\text{NTf}_2^-] = [\text{RH}^+] + [[\text{R}^-]^+] \quad (\text{S3})$$

$$[\text{Na}^+] + [\text{SH}_2^+] + [\text{RH}^+] = [\text{S}^-] + [\text{NTf}_2^-] \quad (\text{S4})$$

[X] means the concentrations of the corresponding ions. For example, [[R<sup>-</sup>]<sup>+</sup>] means the concentration of [R<sup>-</sup>]<sup>+</sup> in the solution during the titration and [[RH<sup>+</sup>][NTf<sub>2</sub><sup>-</sup>]]<sub>total</sub> means the total concentration of the ILs. Therefore, from Eqs (S2), (S3), (S4), we

have

$$K_a = \frac{[Na^+] + [SH_2^+] - [S^-]}{[S^-] + [NTf_2^-] - [Na^+] - [SH_2^+]} * [SH_2^+] \quad (S5)$$

When the pH value is lower than 7 during the titration, there is an assumption that the value of  $[S^-]$  could be neglected and the equation becomes:

$$K_a = \frac{[Na^+] + [SH_2^+]}{[NTf_2^-] - [Na^+] - [SH_2^+]} * [SH_2^+] \quad (S6)$$

Here in the Eq (S6), the only unknown parameter is the  $[SH_2^+]$  and from the pH values, the activity concentration  $a_{[SH_2^+]}$  could be calculated. To figure out the actual concentration of the  $\{SH_2^+\}$ , activity coefficient  $f_{[SH_2^+]}$  needs to be known, as Eqs (S7), (S8), (S9) display.

$$[SH_2^+] = \frac{a_{[SH_2^+]}}{f_{[SH_2^+]}} \quad (S7)$$

$$-\log f_{[SH_2^+]} = \frac{\frac{1}{2} Z^2 I^{1/2}}{1 + I^{1/2}} \quad (S8)$$

$$I = \frac{1}{2} \sum Z^2 [X] \quad (S9)$$

I above means the ionic strength of the solution and Z means the charge number of the ions. However, on account of high-concentration of KCl, the ionic strength of solution was almost the same during the whole titration and the variation could be neglected.

## 2. Fitting of the viscosities

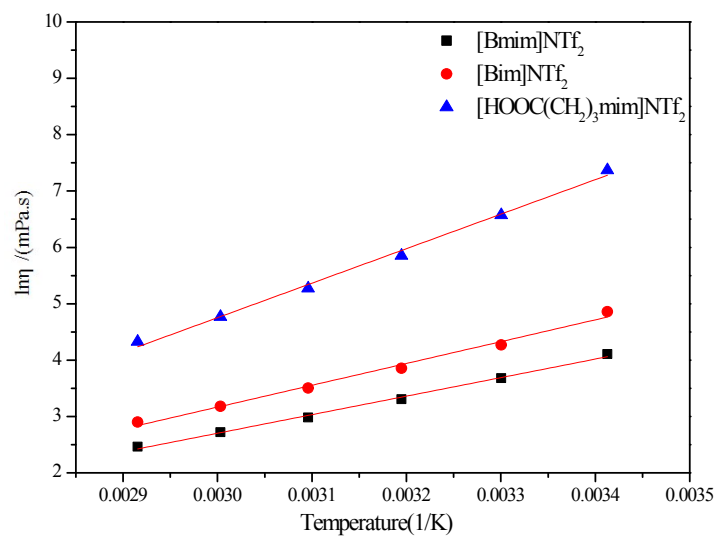

Figure S1. Semi-logarithmic Arrhenius-like plots.

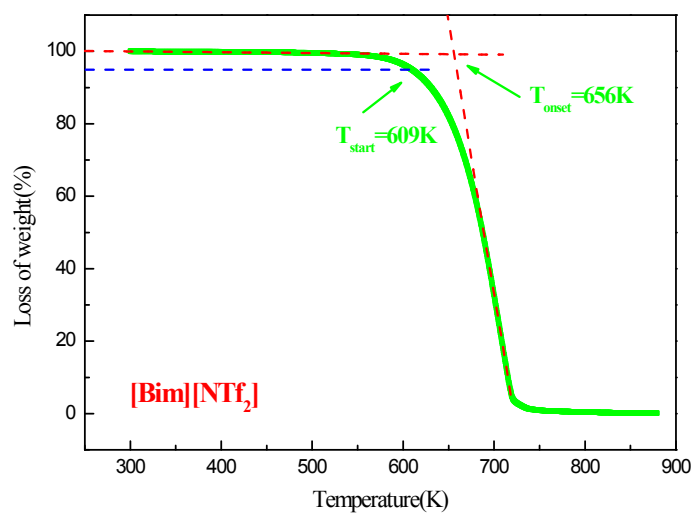

Figure S2. Thermogravimetric analysis of decomposition of [Bim][NTf<sub>2</sub>] as a function of temperature.

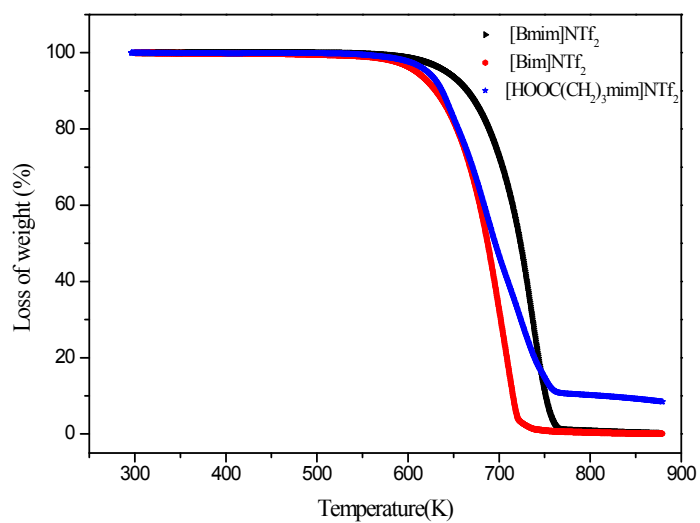

Figure S3. TGA trace of ILs at a heating rate of 10 K/min in the N<sub>2</sub> atmosphere

Table S1. Onset and start temperatures for thermal decomposition of the ILs

| ILs                                                       | T <sub>onset</sub> /K | T <sub>start</sub> /K <sup>[B]</sup> |
|-----------------------------------------------------------|-----------------------|--------------------------------------|
| BmimNTf <sub>2</sub>                                      | 687                   | 643                                  |
| BimNTf <sub>2</sub>                                       | 656                   | 609                                  |
| [HOOC(CH <sub>2</sub> ) <sub>3</sub> mim]NTf <sub>2</sub> | 637                   | 621                                  |

[B]: temperature with 5% weight loss

### 3. Reliability of our apparatus

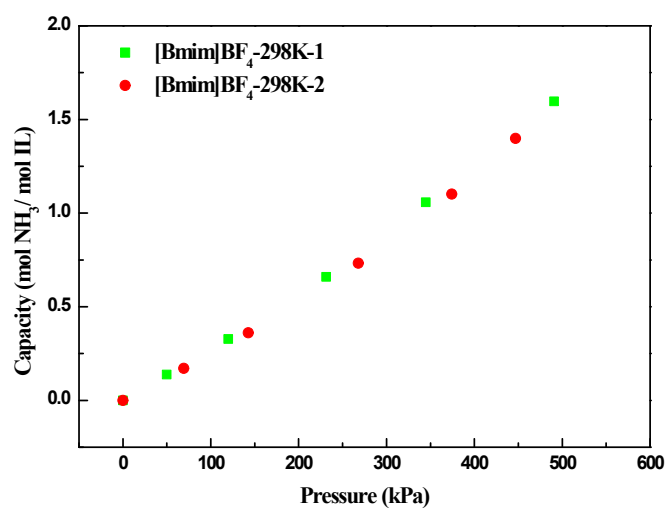

Figure S4. Reliability check of the apparatus using [Bmim][BF<sub>4</sub>]

4. <sup>1</sup>H-NMR spectra of the ILs and [Bim][NTf<sub>2</sub>] with different concentrations of NH<sub>3</sub>

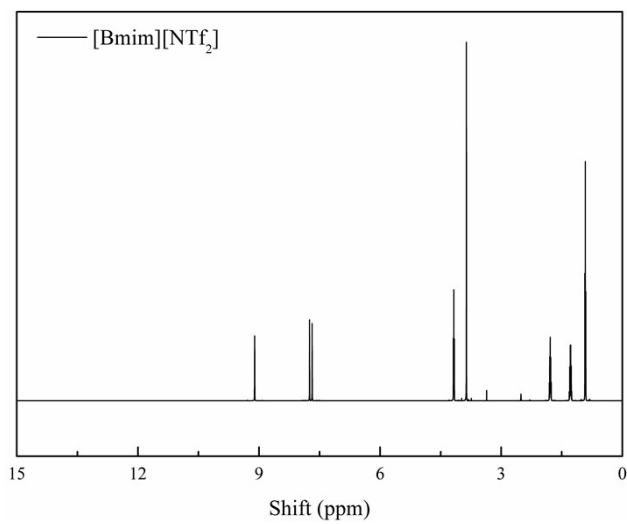

Figure S5. <sup>1</sup>H-NMR spectrum of [Bmim][NTf<sub>2</sub>] in DMSO

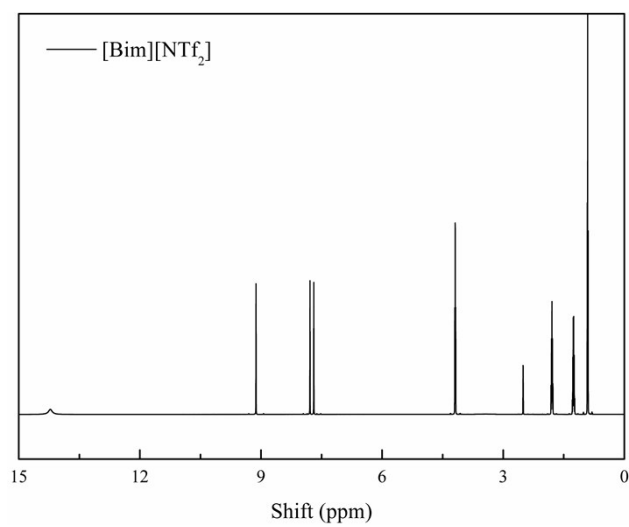

Figure S6. <sup>1</sup>H-NMR spectrum of [Bim][NTf<sub>2</sub>] in DMSO

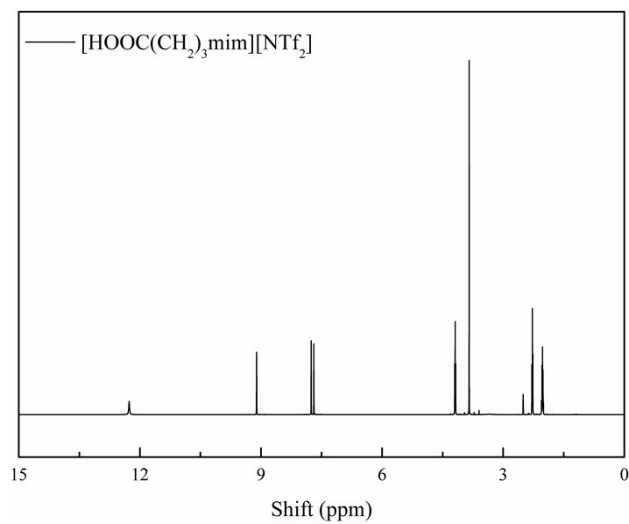

Figure S7. <sup>1</sup>H-NMR spectrum of [HOOC(CH<sub>2</sub>)<sub>3</sub>mim][NTf<sub>2</sub>] in DMSO

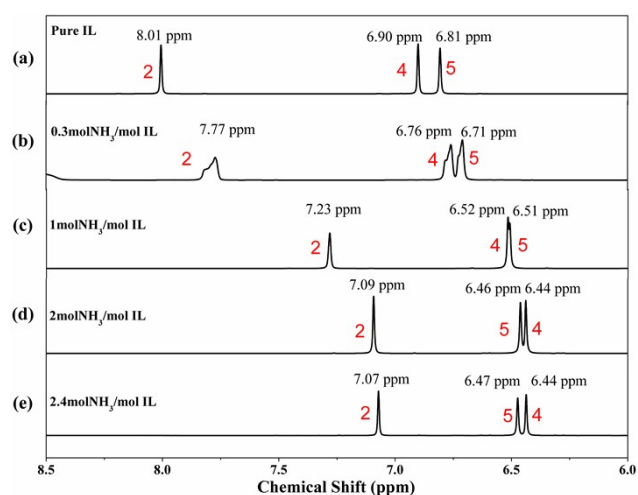

Figure S8.  $^1\text{H}$ -NMR spectra of  $[\text{Bim}][\text{NTf}_2]$  with different concentrations of  $\text{NH}_3$  in drive pipe in DMSO

## 5. Optimized structures and interaction energies for $[\text{Bim}]^+-3\text{NH}_3$

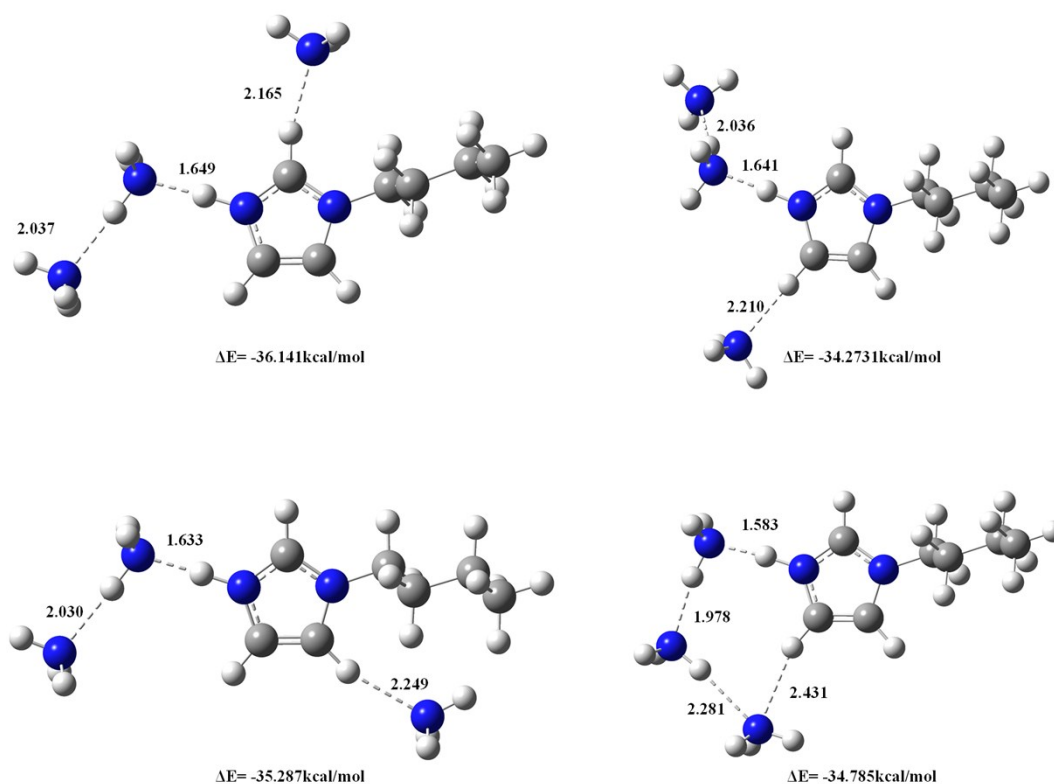

Figure S9. Optimized structures and interaction energies for  $[\text{Bim}]^+-3\text{NH}_3$  (N, blue; H, white; C, gray)

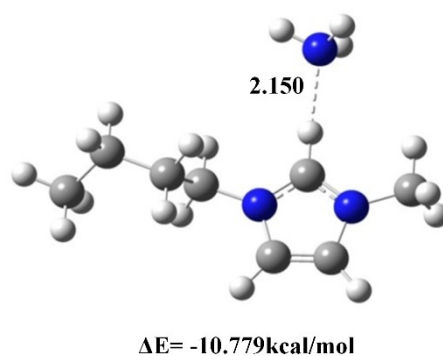

Figure S10. Optimized structures and interaction energies for [Bmim]<sup>+</sup>- NH<sub>3</sub> (N, blue; H, white; C, gray)
